# Supplementary material
Source: PubMed Central journal article supplement (PMC7267193)
Supplement: AEM.00508-20-s0001.pdf [file AEM.00508-20-s0001.pdf]

## *Supplemental Materials*

### **AccR, a TetR family transcriptional repressor, coordinates short-chain acyl-CoAs homeostasis in *Streptomyces avermitilis***

Mengya Lyu, Yaqing Cheng, Xiao Han, Ying Wen, Yuan Song, Jilun Li, Zhi Chen\*

State Key Laboratory of Agrobiotechnology and Key Laboratory of Soil Microbiology,  
Ministry of Agriculture, College of Biological Sciences, China Agricultural University,  
Beijing 100193, China.

\*Corresponding author. E-mail [chenzhi@cau.edu.cn](mailto:chenzhi@cau.edu.cn).

**Table S1. Predicted target genes of AccR in *S. avermitilis*.**

| Classification                    | Gene                 | Function                                             | Sequence         | Position <sup>a</sup> | Score | EMSA <sup>b</sup> |
|-----------------------------------|----------------------|------------------------------------------------------|------------------|-----------------------|-------|-------------------|
| Regulator                         |                      |                                                      |                  |                       |       |                   |
|                                   | <i>SAV5279</i>       | TetR/AcrR family transcriptional regulator           | GTTAATGAGCGTTAAC | -67                   | 22.3  | +                 |
|                                   | <i>SAV5279</i>       | TetR/AcrR family transcriptional regulator           | GTTAACGACCGCTAAC | -38                   | 20.3  | +                 |
| Fatty acid and lipid metabolism   |                      |                                                      |                  |                       |       |                   |
|                                   | <i>SAV5278 accD1</i> | acetyl/propionyl-CoA carboxylase $\beta$ -subunit    | GTTAATGAGCGTTAAC | -46                   | 22.3  | +                 |
|                                   | <i>SAV5278 accD1</i> | acetyl/propionyl-CoA carboxylase $\beta$ -subunit    | GTTAACGACCGCTAAC | -75                   | 20.6  | +                 |
|                                   | <i>SAV6919 fadE2</i> | acyl-CoA dehydrogenase                               | GTGAGCGCTCGTTAAC | -184                  | 16.4  | +                 |
|                                   | <i>SAV3327 echA9</i> | enoyl-CoA hydratase                                  | GTTAACGCGGGTTAAC | -28                   | 13.9  | +                 |
|                                   | <i>SAV2786 echA8</i> | enoyl-CoA hydratase                                  | GTTAACGCGGACTAAC | -24                   | 11.5  | +                 |
|                                   | <i>SAV5026 fadE1</i> | acyl-CoA dehydrogenase                               | CTTAACGGTAATTAGC | -37                   | 11    | -                 |
|                                   | <i>SAV3460 icmB</i>  | isobutyryl-CoA mutase                                | GTGAACGAACGTTATC | -86                   | 10.1  | -                 |
| Carbohydrate metabolism           |                      |                                                      |                  |                       |       |                   |
|                                   | <i>SAV6918 chiC2</i> | chitinase                                            | GTGAGCGCTCGTTAAC | -256                  | 16.4  | +                 |
|                                   | <i>SAV5025 udgA</i>  | UDP-glucose/GDP-mannose dehydrogenase family protein | CTTAACGGTAATTAGC | -154                  | 11    | -                 |
| Cell division and differentiation |                      |                                                      |                  |                       |       |                   |
|                                   | <i>SAV4026 amfC</i>  | AmfC protein                                         | GTTAAGGCTAATTAAG | -113                  | 12.2  | ND                |
| Transport                         |                      |                                                      |                  |                       |       |                   |
|                                   | <i>SAV1133</i>       | MFS transporter                                      | GTGAATGGTCATTAC  | -79                   | 10.1  | -                 |
| RNA modification                  |                      |                                                      |                  |                       |       |                   |
|                                   | <i>SAV4027 dtd</i>   | D-aminoacyl-tRNA deacylase                           | GTTAAGGCTAATTAAG | -73                   | 12.2  | ND                |
| Protein modification              |                      |                                                      |                  |                       |       |                   |
|                                   | <i>SAV4118</i>       | M23 family peptidase                                 | CTTACTGATCGTTAAC | -266                  | 11.9  | ND                |
|                                   | <i>SAV4118</i>       | M23 family peptidase                                 | GTTATCGAACGTTAAT | -222                  | 11.1  | ND                |

<sup>a</sup> Distance from translation start site.

<sup>b</sup> +: AccR binds to the promoter region of gene. -: no binding. ND: not detected.

**Fig. S1**

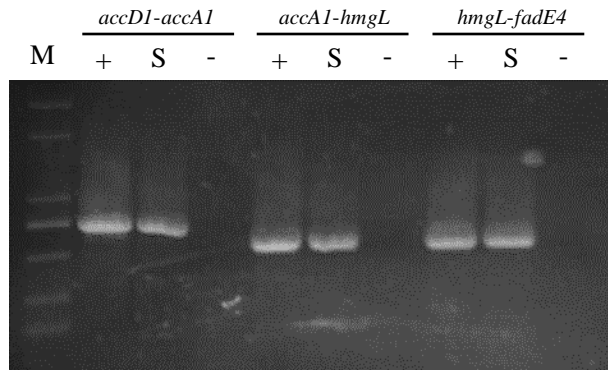

**Fig. S1. RT-PCR analysis of *accD1-accA1-hmgL-fadE4* co-transcription in *S. avermitilis*.** The cDNA obtained by reverse transcription of DaccR RNA was used as template (lane S) for determination of *accD1-accA1*, *accA1-hmgL*, and *hmgL-fadE4* co-transcription. WT DNA was used as positive control (lane +), and water was used as negative control (lane -). M: 2000-bp DNA marker.

**Fig. S2**

**A**

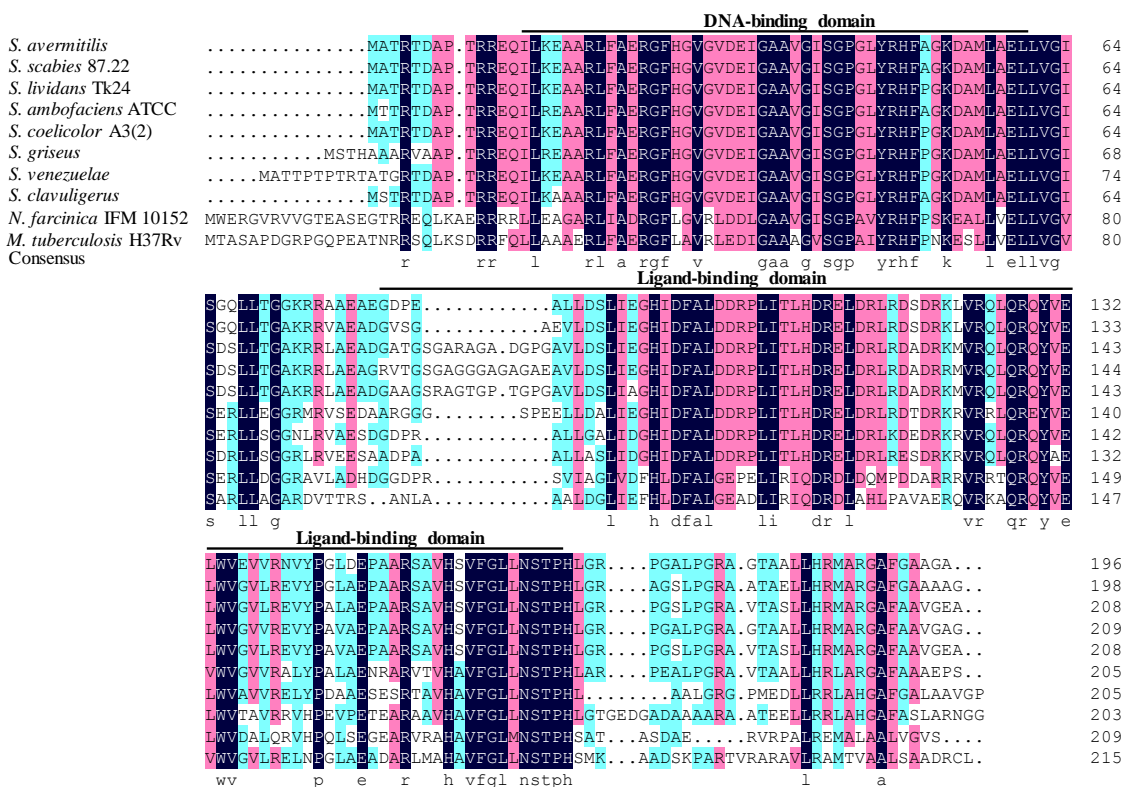

**B**

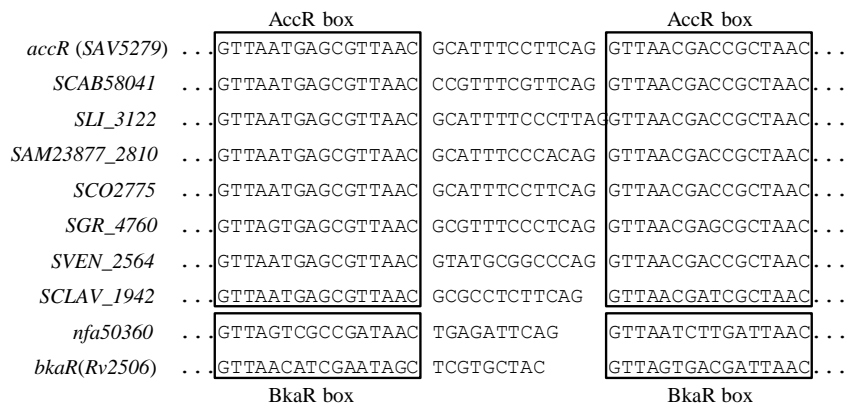

**Fig. S2. Alignments of amino acid sequences (A) and binding sites in promoter regions (B) of AccR in *Streptomyces*, *Nocardia farcinica*, and *M. tuberculosis*.**

Identities of AccR with its orthologs: SACB58041 (91%), SLI\_3122 (84%),

SAM23877\_2810 (84%), SCO2775 (83%), SGR\_4760 (81%), SVEN\_2564 (78%),  
SCLAV\_1942 (76%), Nfa50360 (53%), BkaR (50%).

**Fig. S3**

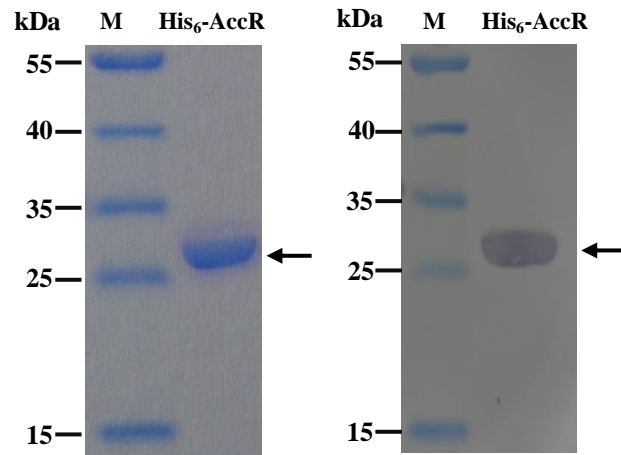

**Fig. S3. SDS-PAGE (left) and Western blotting (right) of purified His<sub>6</sub>-AccR.**



**Fig. S5**

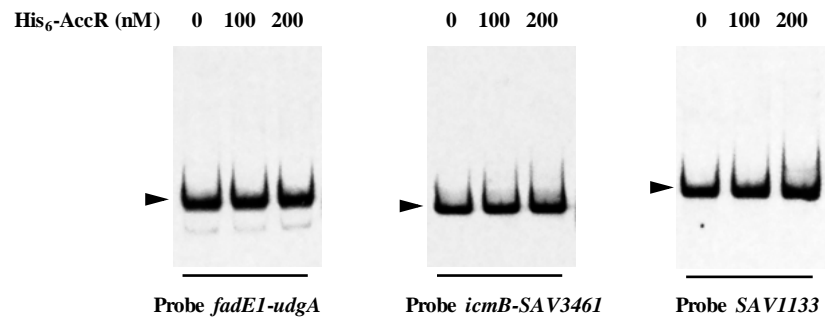

**Fig. S5. Interaction of AccR with predicted target genes analyzed by EMSAs. Arrows:**  
free probes.



**Fig. S6**

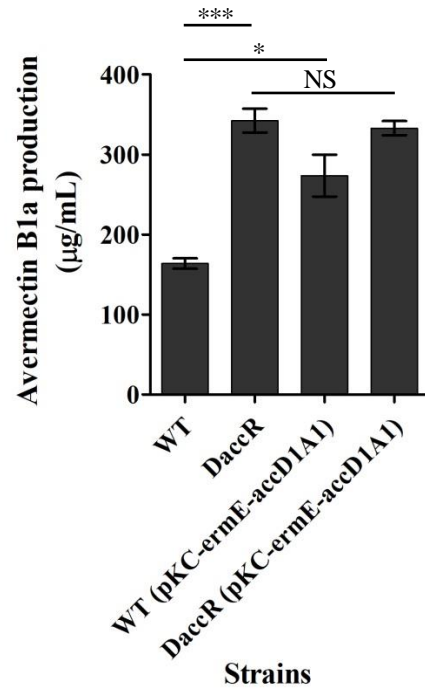

**Fig. S6. Avermectin B1a production of WT, DaccR and *accD1A1* overexpression strains (in WT and DaccR) in FM-I. NS, not significant. \*,  $P < 0.05$ ; \*\*\*,  $P < 0.001$  (Student's *t*-test).**

**Fig. S7**

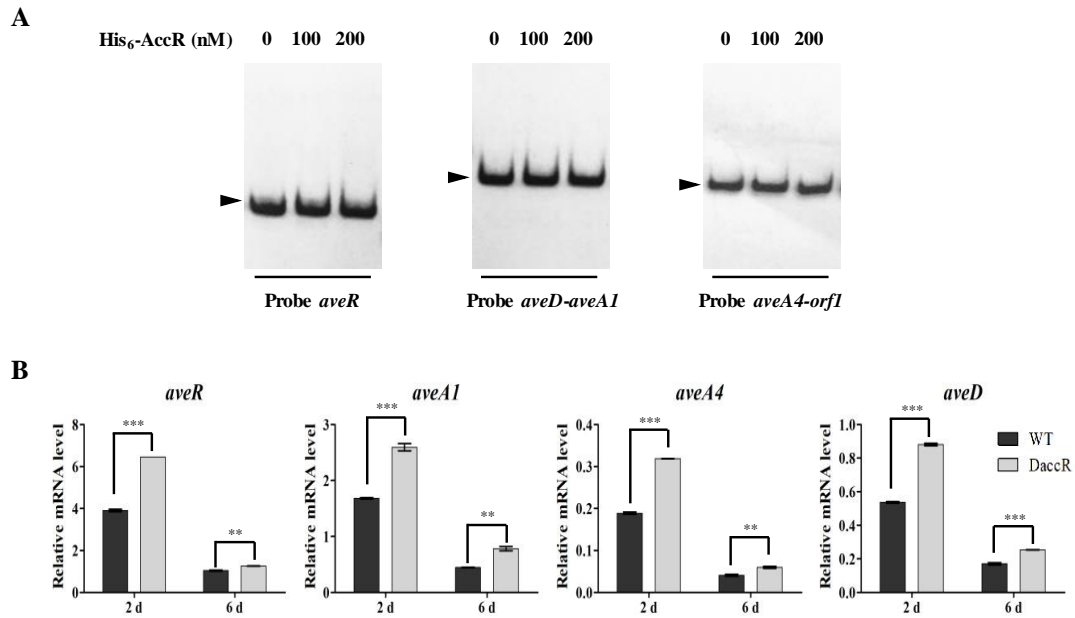

**Fig. S7. Regulatory effect of AccR on *ave* genes.** (A) EMSAs of AccR with promoter region of *aveR* and intergenic regions of *aveD-aveA1* and *aveA4-orf1*. Arrows: free DNA probes. (B) RT-qPCR analysis of transcription levels of *ave* genes in WT and DaccR. \*\*,  $P < 0.01$ ; \*\*\*,  $P < 0.001$  (Student's *t*-test).

**Fig. S8**

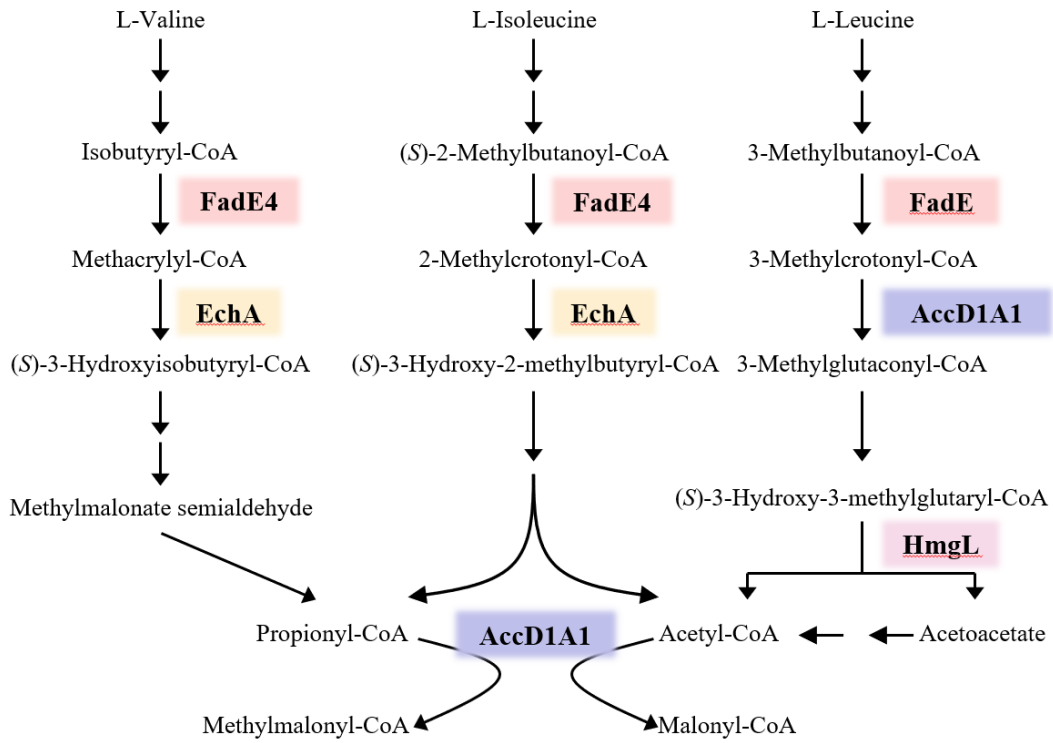

**Fig. S8. AccR represses the transcription of genes involved in the branched-chain amino acid degradation pathway.**

**Fig. S9**

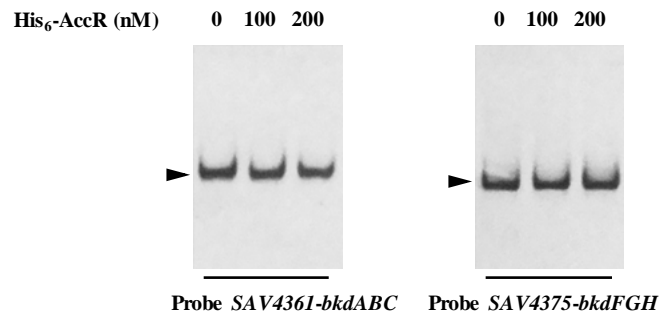

**Fig. S9. EMSAs of AccR with intergenic regions of *SAV4361-bkdABC* and *SAV4375-bkdFGH*. Arrows: free DNA probes.**
